# Supplementary material
Source: HighWire-hosted journal article supplement (https://cmaj.ca/highwire/filestream/77472/field_highwire_adjunct_files/0/20-0869-res-1-at.pdf)
Supplement: 20-0869-res-1-at.pdf [file 20-0869-res-1-at.pdf]

## Appendix 1 (as supplied by the authors): Anosmia – telephone questionnaire for patients who got tested for COVID-19

Record ID \_\_\_\_\_

### SCRIPT INTERVIEW

Hello, my name is [NAME OF INTERVIEWER] and I work for the CIUSSSE de l'Estrie-CHUS. I would like to speak with [MR or MRS] [NAME OF PATIENT].

**\* IF THE SPEAKER IS NOT THE PATIENT**

**\*\* IF THERE ARE OTHER MEMBERS OF THE FAMILY THAT WERE TESTED FOR COVID-19, SPEAK WITH THEM AFTERWARDS.**

Hello, [MR or MRS] [NAME OF PATIENT] my name is [NAME OF INTERVIEWER] and I work for the CIUSSSE de l'Estrie-CHUS. We are conducting clinical surveillance of COVID-19 for all persons over 18 years of age who got tested for COVID-19, whether the result is positive or negative. We are not authorized to divulge test results. A Public Health Official will contact you with your results.

Our research team would like to better understand the COVID-19 virus which could allow for persons affected by the virus to receive better health services.

During this call, we will be asking you questions regarding your health. Your answers will not have any incidence on the quality of health services that you receive. Our hope is that it will permit physicians and other health care professionals to be better informed about this virus.

This call will should take approximately 20 minutes of your time. Your answers are confidential and will be stored securely for 25 years in accordance with the current research policies in effect. The information relayed to the health care workers will be anonymous, meaning that they will not be able to identify you.

Do you have any questions?

Before starting the questionnaire, I would also like to confirm your consent for the use of the data for research purposes. More specifically, your information is essential for the public health but could also be pertinent for other current or future researches, that would be related to the coronavirus. Theses researches will all be evaluated by a research ethics committee. The projects would not use information that would permit you to be identified, such as your name, address or phone number.

Do you have any questions regarding the secondary use of the research data?

Do you consent to the use of secondary data, that excludes your name, address and phone number?     No     Yes

### INSTRUCTIONS FOR THE INTERVIEWER:

- If a patient refuses the use of the data, take note of the patient's name and telephone number in a confidential file, that will later be sent to Dr Louis Valiquette once all calls are completed.
- If a patient asks for more information regarding the use of their secondary data, they may contact the President of the Ethics Committee at 819-346-1110 extension 12856.
- Patients who received a positive COVID-19 result may call 819-644-4545 if they have questions pertaining to their diagnostic.
- For those who are still awaiting their results, a Public Health Official will call them when the result is available.
- For more information <https://www.inspq.qc.ca/covid-19/outils>

Signature of employee completing the questionnaire: \_\_\_\_\_

| DEMOGRAPHICS               |                                                            |
|----------------------------|------------------------------------------------------------|
| Name                       | _____<br>First name, Last Name                             |
| CIUSSE-CHUS<br>File number |                                                            |
| Postal code                | _____<br>(999 if unknown)                                  |
| Date of birth              | _____<br>(01-01-1901 if unknown)                           |
| Sex at birth               | <input type="radio"/> Female<br><input type="radio"/> Male |
| Telephone number           |                                                            |

| SARS-CoV-2 TEST                 |                                                                                                                                                                                                              |
|---------------------------------|--------------------------------------------------------------------------------------------------------------------------------------------------------------------------------------------------------------|
| Sample date                     | _____<br>(01-01-1901 if unknown)                                                                                                                                                                             |
| Site where sample was collected | <input type="radio"/> Hôtel-Dieu<br><input type="radio"/> Asbestos<br><input type="radio"/> Lac Megantic<br><input type="radio"/> Granby<br><input type="radio"/> Windsor<br><input type="radio"/> Coaticook |
| SARS-CoV-2 test result          | <input type="radio"/> Negative<br><input type="radio"/> Positive                                                                                                                                             |

| SUMMARY OF CONTACT WITH PATIENT                              |                                                                                                                                                                                                                                                                                                                                          |
|--------------------------------------------------------------|------------------------------------------------------------------------------------------------------------------------------------------------------------------------------------------------------------------------------------------------------------------------------------------------------------------------------------------|
| Was the patient reached?                                     | <input type="radio"/> No<br><input type="radio"/> Yes                                                                                                                                                                                                                                                                                    |
| If not, specify the reason                                   | <input type="radio"/> Incorrect telephone number<br><input type="radio"/> 8 unsuccessful attempts<br><input type="radio"/> Patient is deceased<br><input type="radio"/> Patient is inapt (excluded from the study)<br><input type="radio"/> Patient is still hospitalised<br><input type="radio"/> Other (please precise in space below) |
| Precise 'Other' reason                                       |                                                                                                                                                                                                                                                                                                                                          |
| If the patient was reached, was the questionnaire completed? | <input type="radio"/> No<br><input type="radio"/> Yes – Consents to the use of data for research<br><input type="radio"/> Yes – Refuses the use of data for research                                                                                                                                                                     |
| If not completed, specify reason                             | <input type="radio"/> Patient refused<br><input type="radio"/> Patient is inapt (excluded from the study)<br><input type="radio"/> Patient is deceased<br><input type="radio"/> Other (please precise in space below)                                                                                                                    |
| Precise 'Other' reason                                       |                                                                                                                                                                                                                                                                                                                                          |
| Have you received you COVID-19 test results?                 | <input type="radio"/> No<br><input type="radio"/> Yes <b>Result</b> <input type="radio"/> Negative <input type="radio"/> Positive                                                                                                                                                                                                        |

|                                                                           |                                                                                                                                                                                                                                                                                                                 |
|---------------------------------------------------------------------------|-----------------------------------------------------------------------------------------------------------------------------------------------------------------------------------------------------------------------------------------------------------------------------------------------------------------|
| Is there another member of your family that has been tested for COVID-19? | <input type="radio"/> No<br><input type="radio"/> Yes<br><br>* If yes, verify if that person is on the <a href="#">Covid19-Anosmie Listing Calls à faire</a> .<br>If the patient is on the list, inform the current patient that we will speak with [NAME OF FAMILY MEMBER] once the questionnaire is completed |
| Have you been hospitalised for this condition?                            | <input type="radio"/> No<br><input type="radio"/> Yes                                                                                                                                                                                                                                                           |
| Are you pregnant?                                                         | <input type="radio"/> No<br><input type="radio"/> Yes<br><input type="radio"/> Not applicable                                                                                                                                                                                                                   |

| <b>COMORBIDITIES</b>                                                                                                          |                                                                                                                                |
|-------------------------------------------------------------------------------------------------------------------------------|--------------------------------------------------------------------------------------------------------------------------------|
| Are you being treated for diabetes?                                                                                           | <input type="radio"/> No<br><input type="radio"/> Yes                                                                          |
| <b>RISK FACTORS AND ASSOCIATED CONDITIONS</b>                                                                                 |                                                                                                                                |
| What is your smoking status?                                                                                                  | <input type="radio"/> Active (including occasional)<br><input type="radio"/> Past smoker<br><input type="radio"/> Never smoked |
| If you are a past smoker, have you smoked in the last year?                                                                   | <input type="radio"/> No<br><input type="radio"/> Yes                                                                          |
| Do you vape or smoke e-cigarettes?                                                                                            | <input type="radio"/> No<br><input type="radio"/> Yes                                                                          |
| Do you smoke cannabis on a regular basis?                                                                                     | <input type="radio"/> No<br><input type="radio"/> Yes                                                                          |
| In the past year, have you inhaled cocaine nasally?                                                                           | <input type="radio"/> No<br><input type="radio"/> Yes                                                                          |
| Have you ever had a traumatic (shock) to the head caused either by a fall, a major hit or a car accident (head-on collision)? | <input type="radio"/> No<br><input type="radio"/> Yes                                                                          |
| Have you received a medical diagnostic of seasonal allergies (pollen, hay fever)?                                             | <input type="radio"/> No<br><input type="radio"/> Yes                                                                          |
| Have you received a medical diagnostic of animal allergies?                                                                   | <input type="radio"/> No<br><input type="radio"/> Yes                                                                          |
| Do you have nasal congestion all year round?                                                                                  | <input type="radio"/> No<br><input type="radio"/> Yes                                                                          |
| Do you have a runny/leaky nose all year round?                                                                                | <input type="radio"/> No<br><input type="radio"/> Yes                                                                          |
| Do you take cortisone in the form of nasal vaporiser on a regular basis? (ex: Nasocort, Nasonex)                              | <input type="radio"/> No<br><input type="radio"/> Yes – all year<br><input type="radio"/> Yes – only during allergy season     |

| <b>SIGNS AND SYMPTOMS</b>                            |                                              |
|------------------------------------------------------|----------------------------------------------|
| When did your first COVID-19 related symptoms start? | <br><br><br>_____<br>(01-01-1901 if unknown) |

| During the period of 72 hours BEFORE and AFTER your COVID-19 test, did you have any of the following symptoms? |                                                                                                                                                                                                                                                                                                                                                           |                       |
|----------------------------------------------------------------------------------------------------------------|-----------------------------------------------------------------------------------------------------------------------------------------------------------------------------------------------------------------------------------------------------------------------------------------------------------------------------------------------------------|-----------------------|
|                                                                                                                | NO                                                                                                                                                                                                                                                                                                                                                        | YES                   |
| Generalized weakness (include fatigue)                                                                         | <input type="radio"/>                                                                                                                                                                                                                                                                                                                                     | <input type="radio"/> |
| Muscular pain                                                                                                  | <input type="radio"/>                                                                                                                                                                                                                                                                                                                                     | <input type="radio"/> |
| Joint pain                                                                                                     | <input type="radio"/>                                                                                                                                                                                                                                                                                                                                     | <input type="radio"/> |
| Chest pain                                                                                                     | <input type="radio"/>                                                                                                                                                                                                                                                                                                                                     | <input type="radio"/> |
| Shortness of breath                                                                                            | <input type="radio"/>                                                                                                                                                                                                                                                                                                                                     | <input type="radio"/> |
| Dyspnea/Difficulty breathing                                                                                   | <input type="radio"/>                                                                                                                                                                                                                                                                                                                                     | <input type="radio"/> |
| Chills                                                                                                         | <input type="radio"/>                                                                                                                                                                                                                                                                                                                                     | <input type="radio"/> |
| Fever > 38° C                                                                                                  | <input type="radio"/>                                                                                                                                                                                                                                                                                                                                     | <input type="radio"/> |
| Feverishness (did not take temperature but felt feverish)                                                      | <input type="radio"/>                                                                                                                                                                                                                                                                                                                                     | <input type="radio"/> |
| Nasal congestion                                                                                               | <input type="radio"/>                                                                                                                                                                                                                                                                                                                                     | <input type="radio"/> |
| Runny nose                                                                                                     | <input type="radio"/>                                                                                                                                                                                                                                                                                                                                     | <input type="radio"/> |
| Sneezing                                                                                                       | <input type="radio"/>                                                                                                                                                                                                                                                                                                                                     | <input type="radio"/> |
| Sore throat                                                                                                    | <input type="radio"/>                                                                                                                                                                                                                                                                                                                                     | <input type="radio"/> |
| Cough                                                                                                          | <input type="radio"/>                                                                                                                                                                                                                                                                                                                                     | <input type="radio"/> |
| Sputum production (phlegm, mucus)                                                                              | <input type="radio"/>                                                                                                                                                                                                                                                                                                                                     | <input type="radio"/> |
| Loss of appetite                                                                                               | <input type="radio"/>                                                                                                                                                                                                                                                                                                                                     | <input type="radio"/> |
| Nausea                                                                                                         | <input type="radio"/>                                                                                                                                                                                                                                                                                                                                     | <input type="radio"/> |
| Vomiting                                                                                                       | <input type="radio"/>                                                                                                                                                                                                                                                                                                                                     | <input type="radio"/> |
| Diarrhea (liquid stools)                                                                                       | <input type="radio"/>                                                                                                                                                                                                                                                                                                                                     | <input type="radio"/> |
| Headache                                                                                                       | <input type="radio"/>                                                                                                                                                                                                                                                                                                                                     | <input type="radio"/> |
| Conjunctivitis (eye infection)                                                                                 | <input type="radio"/>                                                                                                                                                                                                                                                                                                                                     | <input type="radio"/> |
| Skin rash/lesion or redness                                                                                    | <input type="radio"/>                                                                                                                                                                                                                                                                                                                                     | <input type="radio"/> |
| Change or loss of smell                                                                                        | <input type="radio"/>                                                                                                                                                                                                                                                                                                                                     | <input type="radio"/> |
| Change or loss of taste                                                                                        | <input type="radio"/>                                                                                                                                                                                                                                                                                                                                     | <input type="radio"/> |
| Vertigo or dizziness                                                                                           | <input type="radio"/>                                                                                                                                                                                                                                                                                                                                     | <input type="radio"/> |
| Blurred vision                                                                                                 | <input type="radio"/>                                                                                                                                                                                                                                                                                                                                     | <input type="radio"/> |
| Loss of hot/cold facial sensation                                                                              | <input type="radio"/>                                                                                                                                                                                                                                                                                                                                     | <input type="radio"/> |
| Which one of your symptoms appeared first?                                                                     | <input type="radio"/> Generalized weakness<br><input type="radio"/> Muscular pain<br><input type="radio"/> Joint pain<br><input type="radio"/> Chest pain<br><input type="radio"/> Shortness of breath<br><input type="radio"/> Difficulty breathing<br><input type="radio"/> Chills<br><input type="radio"/> Fever<br><input type="radio"/> Feverishness |                       |

|                                              |                                                                                                                                                                                                                                                                                                                                                                                                                                                                                                                                                                                                                                                                                                                                                                                                                          |
|----------------------------------------------|--------------------------------------------------------------------------------------------------------------------------------------------------------------------------------------------------------------------------------------------------------------------------------------------------------------------------------------------------------------------------------------------------------------------------------------------------------------------------------------------------------------------------------------------------------------------------------------------------------------------------------------------------------------------------------------------------------------------------------------------------------------------------------------------------------------------------|
|                                              | <ul style="list-style-type: none"> <li>○ Nasal congestion</li> <li>○ Runny nose</li> <li>○ Sneezing</li> <li>○ Sore throat</li> <li>○ Cough</li> <li>○ Sputum production</li> <li>○ Loss of appetite</li> <li>○ Nausea</li> <li>○ Vomiting</li> <li>○ Diarrhea (liquid stools)</li> <li>○ Headache</li> <li>○ Conjunctivitis (eye infection)</li> <li>○ Skin rash/lesion or redness</li> <li>○ Change or loss of smell</li> <li>○ Change or loss of taste</li> <li>○ Vertigo, dizziness</li> <li>○ Blurred vision</li> <li>○ Loss of hot/cold facial sensation</li> <li>○ None</li> </ul>                                                                                                                                                                                                                                |
| <p>Which of your symptoms was the worst?</p> | <ul style="list-style-type: none"> <li>○ Generalized weakness</li> <li>○ Muscular pain</li> <li>○ Joint pain</li> <li>○ Chest pain</li> <li>○ Shortness of breath</li> <li>○ Difficulty breathing</li> <li>○ Chills</li> <li>○ Fever</li> <li>○ Feverishness</li> <li>○ Nasal congestion</li> <li>○ Runny nose</li> <li>○ Sneezing</li> <li>○ Sore throat</li> <li>○ Cough</li> <li>○ Sputum production</li> <li>○ Loss of appetite</li> <li>○ Nausea</li> <li>○ Vomiting</li> <li>○ Diarrhea (liquid stools)</li> <li>○ Headache</li> <li>○ Conjunctivitis (eye infection)</li> <li>○ Skin rash/lesion or redness</li> <li>○ Change or loss of smell</li> <li>○ Change or loss of taste</li> <li>○ Vertigo, dizziness</li> <li>○ Blurred vision</li> <li>○ Loss of hot/cold facial sensation</li> <li>○ None</li> </ul> |

| <b>ANNEX 1 – SENSORY PERCEPTION</b>                                                                         |                                                                                                                                                                                    |
|-------------------------------------------------------------------------------------------------------------|------------------------------------------------------------------------------------------------------------------------------------------------------------------------------------|
| <b>Baseline information</b>                                                                                 |                                                                                                                                                                                    |
| Before the onset of COVID-19 related symptoms, how do you evaluate your capacity to smell odours?           | <input type="radio"/> Not at all<br><input type="radio"/> Weak<br><input type="radio"/> Good<br><input type="radio"/> Very good<br><input type="radio"/> Don't know/Does not apply |
| Before the onset of COVID-19 related symptoms, how do you evaluate your capacity to taste foods in general? | <input type="radio"/> Not at all<br><input type="radio"/> Weak<br><input type="radio"/> Good<br><input type="radio"/> Very good<br><input type="radio"/> Don't know/Does not apply |
| <b>Have you had any of the following?</b>                                                                   |                                                                                                                                                                                    |
| Brain surgery                                                                                               | <input type="radio"/> No<br><input type="radio"/> Yes                                                                                                                              |
| Nose surgery (ex: fracture, rhinoplasty)                                                                    | <input type="radio"/> No<br><input type="radio"/> Yes                                                                                                                              |
| Sinus surgery (ex: polyps, abscess drainage)                                                                | <input type="radio"/> No<br><input type="radio"/> Yes                                                                                                                              |
| Radiation therapy (head)                                                                                    | <input type="radio"/> No<br><input type="radio"/> Yes                                                                                                                              |
| Did the surgery or radiation therapy impact your ability to smell odours?                                   | <input type="radio"/> No<br><input type="radio"/> Yes<br><input type="radio"/> Does not apply                                                                                      |

| <b>QUESTIONS RELATING TO THE 72 HOURS BEFORE AND 72 HOURS AFTER THE DIAGNOSTIC OF COVID-19 *Record the worse</b> |                                                                                                                                                                                    |
|------------------------------------------------------------------------------------------------------------------|------------------------------------------------------------------------------------------------------------------------------------------------------------------------------------|
| <b>Sense of smell – Note the worse during this period</b>                                                        |                                                                                                                                                                                    |
| Did the change or loss of smell occur...                                                                         | <input type="radio"/> Suddenly (from one day to the next)<br><input type="radio"/> Progressively (over several days)<br><input type="radio"/> Does not apply                       |
| If there is a change in smell, is it...                                                                          | <input type="radio"/> Light<br><input type="radio"/> Moderate<br><input type="radio"/> Severe                                                                                      |
| How do you evaluate your capacity to recognize the smell scented odors (perfume, soap, shampoo, flowers, etc.)?  | <input type="radio"/> Not at all<br><input type="radio"/> Weak<br><input type="radio"/> Good<br><input type="radio"/> Very good<br><input type="radio"/> Don't know/Does not apply |
| How do you evaluate your capacity to recognize the smell of smoke (wood fire, burnt toast, cigarettes)?          | <input type="radio"/> Not at all<br><input type="radio"/> Weak<br><input type="radio"/> Good<br><input type="radio"/> Very good<br><input type="radio"/> Don't know/Does not apply |
| How do you evaluate your capacity to recognize the smell garbage or compost?                                     | <input type="radio"/> Not at all<br><input type="radio"/> Weak<br><input type="radio"/> Good<br><input type="radio"/> Very good<br><input type="radio"/> Don't know/Does not apply |

|                                                                                    |                                                                                                                                                                                    |
|------------------------------------------------------------------------------------|------------------------------------------------------------------------------------------------------------------------------------------------------------------------------------|
| How do you evaluate your capacity to recognize the smell of freshly poured coffee? | <input type="radio"/> Not at all<br><input type="radio"/> Weak<br><input type="radio"/> Good<br><input type="radio"/> Very good<br><input type="radio"/> Don't know/Does not apply |
| <b>Sense of taste – Note the worse during this period</b>                          |                                                                                                                                                                                    |
| Did you experience a change in taste?                                              | <input type="radio"/> No<br><input type="radio"/> Yes                                                                                                                              |
| Did you experience a loss of taste?                                                | <input type="radio"/> No<br><input type="radio"/> Yes                                                                                                                              |
| Did the change or loss of taste occur...                                           | <input type="radio"/> Suddenly (from one day to the next)<br><input type="radio"/> Progressively (over several days)<br><input type="radio"/> Does not apply                       |
| If there is a change in taste, is it...                                            | <input type="radio"/> Light<br><input type="radio"/> Moderate<br><input type="radio"/> Severe                                                                                      |
| How do you evaluate your capacity to taste foods?                                  | <input type="radio"/> Not at all<br><input type="radio"/> Weak<br><input type="radio"/> Good<br><input type="radio"/> Very good<br><input type="radio"/> Don't know/Does not apply |
| How do you evaluate your capacity to taste salt?                                   | <input type="radio"/> Not at all<br><input type="radio"/> Weak<br><input type="radio"/> Good<br><input type="radio"/> Very good<br><input type="radio"/> Don't know/Does not apply |

Before ending this call, do you have any questions?

Thank you for taking the time to answer our research questions regarding COVID-19. We wish a good day.

**IF THERE ARE OTHER MEMBERS OF YOUR FAMILY THAT BEEN TESTED FOR COVID-19 AND ARE ADULTS OVER 18 YEARS OF AGE, WE WOULD LIKE TO SPEAK TO THEM PLEASE. WHAT IS THEIR NAME?**

**NOTES**

---

---

---

---

---

---

---

---

---

---

---

---

---

---

---

---

---

---

---

---

---

---

---

---
